# Supplementary material
Source: Springer Nature journal article supplement (https://www.springermedizin.de/resource/supplementary/12982_2013_113_MOESM3_ESM.pdf/9604216)

A

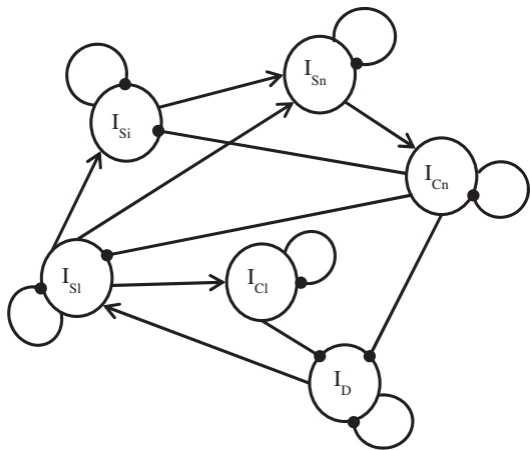

B

$A_2 =$

|          | $I_{Sl}$ | $I_{Si}$ | $I_{Sn}$ | $I_{Cl}$ | $I_{Cn}$ | $I_D$ |
|----------|----------|----------|----------|----------|----------|-------|
| $I_{Sl}$ | -1       | 0        | 0        | 0        | -1       | 1     |
| $I_{Si}$ | 1        | -1       | 0        | 0        | -1       | 0     |
| $I_{Sn}$ | 1        | 1        | -1       | 0        | 0        | 0     |
| $I_{Cl}$ | 1        | 0        | 0        | -1       | 0        | 0     |
| $I_{Cn}$ | 0        | 0        | 1        | 0        | -1       | 0     |
| $I_D$    | 0        | 0        | 0        | -1       | -1       | -1    |

Supplement: MOESM3 [file 9604216]
